# Supplementary figures and images for: Phylogeny and Expression Atlas of the NITRATE TRANSPORTER 1/PEPTIDE TRANSPORTER FAMILY in Agave
Source: MDPI journal article supplement (doi:10.3390/plants11111434), 2022-05-27

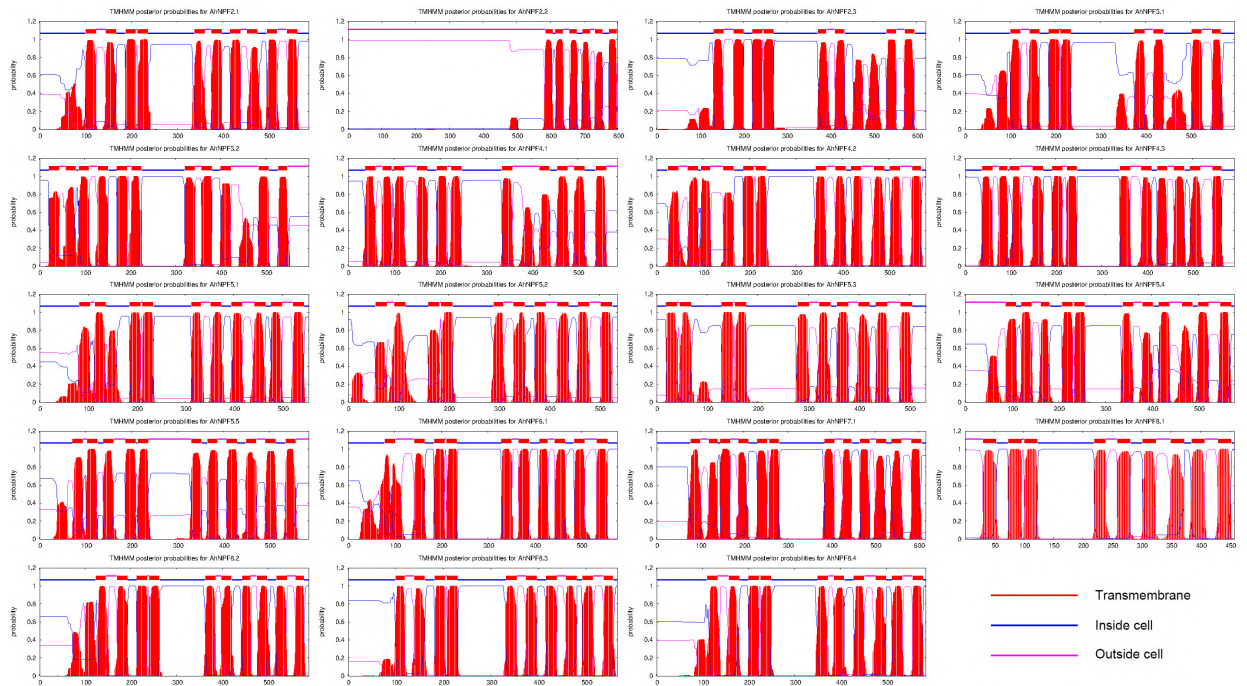

Figure S1. Transmembrane topology analysis of agave NPF proteins.

Supplement: s1 [file s1]
